# Supplementary material for: Phylogeography and postglacial expansion of the endangered semi-aquatic mammal Galemys pyrenaicus
Source: PubMed Central journal article supplement (PMC3682870; doi:10.1186/1471-2148-13-115), 2013-06-06
Supplement: 1471-2148-13-115-S1.pdf [file 1471-2148-13-115-S1.pdf]

**Table S1. Specimens used in this study**

| <b>Specimen Code</b> | <b>Sample Type</b> | <b>Locality</b>                      | <b>Basin</b>      | <b>Latitude</b> | <b>Longitude</b> |
|----------------------|--------------------|--------------------------------------|-------------------|-----------------|------------------|
| IBE-C216             | Faeces             | Ars                                  | Ebro              | 42.4            | 1.4              |
| IBE-C224             | Faeces             | Ars                                  | Ebro              | 42.4            | 1.4              |
| IBE-C320             | Tissue             | Tor                                  | Ebro              | 42.6            | 1.4              |
| IBE-C321             | Tissue             | Tor                                  | Ebro              | 42.6            | 1.4              |
| IBE-C421             | Tissue             | Tor                                  | Ebro              | 42.6            | 1.4              |
| IBE-C422             | Tissue             | Tor                                  | Ebro              | 42.6            | 1.4              |
| IBE-C428             | Tissue             | Tor                                  | Ebro              | 42.6            | 1.4              |
| IBE-C437             | Tissue             | Barriomartin                         | Duero             | 42.0            | -2.5             |
| IBE-C438             | Tissue             | San Emiliano                         | Duero             | 43.0            | -6.0             |
| IBE-C448             | Tissue             | Rio Salentinos-Sil                   | Miño              | 42.8            | -6.4             |
| IBE-C449             | Tissue             | Rio Somiedo-Somiedo                  | Cantabrian Basins | 43.1            | -6.3             |
| IBE-C452             | Tissue             | Rio Ambroz-Hervas                    | Tajo              | 40.3            | -5.9             |
| IBE-C485             | Tissue             | Rio Ambroz-Hervas                    | Tajo              | 40.3            | -5.8             |
| IBE-C539             | Faeces             | Confluencia Deva-Cicera              | Cantabrian Basins | 43.2            | -4.6             |
| IBE-C600             | Faeces             | Toran                                | Garona            | 42.8            | 0.8              |
| IBE-C618             | Faeces             | Rio Besaya-Ventorrillo               | Cantabrian Basins | 43.1            | -4.1             |
| IBE-C660             | Tissue             | Ouro Zona Baja-Tamega                | Duero             | 41.5            | -7.8             |
| IBE-C683             | Faeces             | Rio Besaya-Ventorrillo               | Cantabrian Basins | 43.1            | -4.1             |
| IBE-C720             | Faeces             | Cantijan                             | Cantabrian Basins | 43.1            | -4.8             |
| IBE-C723             | Faeces             | Deva                                 | Cantabrian Basins | 43.1            | -4.8             |
| IBE-C737             | Faeces             | Deva                                 | Cantabrian Basins | 43.1            | -4.8             |
| IBE-C779             | Faeces             | Cabecera Douro-Tamega                | Duero             | 41.6            | -8.0             |
| IBE-C802             | Faeces             | Lousas-Zona Baja Beca-Tamega         | Duero             | 41.6            | -7.8             |
| IBE-C831             | Faeces             | Gondiaes-Beca-Tamega                 | Duero             | 41.6            | -7.9             |
| IBE-C844             | Faeces             | Oura                                 | Duero             | 41.7            | -7.5             |
| IBE-C861             | Faeces             | Oura                                 | Duero             | 41.7            | -7.5             |
| IBE-C894             | Faeces             | Ouro-Tamega                          | Duero             | 41.5            | -7.8             |
| IBE-C895             | Faeces             | Avelares-Louredo-Tamega              | Duero             | 41.5            | -7.8             |
| IBE-C919             | Tissue             | Ouro Zona Baja                       | Duero             | 41.5            | -7.8             |
| IBE-C922             | Faeces             | Louredo-Tamega                       | Duero             | 41.5            | -7.9             |
| IBE-C964             | Faeces             | Toran                                | Garona            | 42.8            | 0.8              |
| IBE-C975             | Faeces             | Rio Puerma-Yuso                      | Duero             | 43.1            | -4.9             |
| IBE-C979             | Faeces             | Rio Puerma-Yuso                      | Duero             | 43.1            | -4.9             |
| IBE-C982             | Faeces             | Escrita                              | Ebro              | 42.6            | 1.0              |
| IBE-C990             | Faeces             | Varrados                             | Garona            | 42.8            | 0.8              |
| IBE-C1002            | Faeces             | Puerto de Canto                      | Ebro              | 42.4            | 1.2              |
| IBE-C1053            | Faeces             | Ronas-Najerilla-Anguiano             | Ebro              | 42.2            | -2.8             |
| IBE-C1068            | Faeces             | Portilla-Najerilla-Villavelayo       | Ebro              | 42.1            | -2.9             |
| IBE-C1069            | Tissue             | Rio Calamantio-Mansilla de la Sierra | Ebro              | 42.2            | -2.9             |
| IBE-C1070            | Faeces             | Arroyo Usaya y Oja-Ezcaray           | Ebro              | 42.3            | -3.0             |
| IBE-C1072            | Faeces             | Arroyo Ortigal-Oja-Ezcaray           | Ebro              | 42.2            | -3.1             |
| IBE-C1075            | Faeces             | Oja y Arroyo Altuzarra-Ezcaray       | Ebro              | 42.2            | -3.0             |
| IBE-C1077            | Faeces             | Arroyo Usaya y Oja-Ezcaray           | Ebro              | 42.3            | -3.0             |
| IBE-C1132            | Faeces             | Rio Razoncillo-Molinos de Razon      | Duero             | 42.0            | -2.6             |
| IBE-C1154            | Faeces             | Rio del Oro-Tremado                  | Cantabrian Basins | 43.2            | -6.8             |
| IBE-C1174            | Faeces             | Rio Valledor-Villanueva              | Cantabrian Basins | 43.1            | -6.8             |
| IBE-C1177            | Faeces             | Rio Valledor-Villanueva              | Cantabrian Basins | 43.1            | -6.8             |
| IBE-C1611            | Faeces             | Rio Ter-Pastiura                     | Catalan Basins    | 42.4            | 2.3              |
| IBE-C1612            | Faeces             | Riu Ritort-Espinavell                | Catalan Basins    | 42.4            | 2.4              |
| IBE-C1661            | Faeces             | Rio Razon-Sotillo del Rincon         | Duero             | 41.9            | -2.7             |
| IBE-C1671            | Faeces             | Rio Razon-Sotillo del Rincon         | Duero             | 41.9            | -2.7             |
| IBE-C1687            | Faeces             | Rio Razoncillo-Molinos de Razon      | Duero             | 42.0            | -2.6             |
| IBE-C1729            | Faeces             | Entrambasaguas-Rio Hajar             | Ebro              | 43.0            | -4.3             |
| IBE-C1843            | Faeces             | Rio del Coto-Arroyo de la Brana      | Cantabrian Basins | 43.1            | -6.7             |
| IBE-C1851            | Faeces             | Rio Deva-Convento del Naranco        | Cantabrian Basins | 43.1            | -4.8             |
| IBE-C1869            | Faeces             | Rio de Pumarin-Pontenova             | Cantabrian Basins | 43.3            | -6.7             |
| IBE-C1880            | Faeces             | Rio Cantijan-Puente Pontesque        | Cantabrian Basins | 43.1            | -4.8             |
| IBE-C2517            | Faeces             | Redes-Caleao                         | Cantabrian Basins | 43.2            | -5.4             |
| IBE-C2596            | Faeces             | Rio Valvanera-Monasterio             | Ebro              | 42.2            | -2.9             |
| IBE-C2597            | Faeces             | Rio Cidacos-Peroblasco               | Ebro              | 42.2            | -2.3             |
| IBE-C2607            | Faeces             | Redes-Pendones                       | Cantabrian Basins | 43.1            | -5.3             |
| IBE-C2736            | Tissue             | Rio Caranyo-Covelo                   | Miño              | 42.3            | -8.4             |
| IBE-C2737            | Tissue             | Rio Riobo-A Estrada                  | Galician Basins   | 42.7            | -8.4             |
| IBE-C2738            | Tissue             | Rio Riobo-A Estrada                  | Galician Basins   | 42.7            | -8.4             |
| IBE-C2739            | Tissue             | Rio Cabras-Laza                      | Duero             | 42.1            | -7.4             |
| IBE-C2740            | Tissue             | Rio Meladas-Carballeda               | Miño              | 42.2            | -6.8             |
| IBE-C2741            | Tissue             | Rio Meladas-Carballeda               | Miño              | 42.2            | -6.8             |
| IBE-C2742            | Tissue             | Rio Ourille-Celanova                 | Miño              | 42.2            | -7.9             |
| IBE-C2743            | Tissue             | Rio Ourille-Celanova                 | Miño              | 42.2            | -7.9             |
| IBE-C2744            | Tissue             | Rio Pontigon-Fonsagrada              | Cantabrian Basins | 43.2            | -7.0             |
| IBE-C2745            | Tissue             | Rio Pontigon-Fonsagrada              | Cantabrian Basins | 43.2            | -7.0             |
| IBE-C2746            | Tissue             | Rio Queixa-Chandrexo de Queixa       | Miño              | 42.2            | -7.4             |
| IBE-C2747            | Tissue             | Rio Queixa-Chandrexo de Queixa       | Miño              | 42.2            | -7.4             |
| IBE-C2749            | Tissue             | Rio Termes-As Neves                  | Miño              | 42.1            | -8.4             |
| IBE-C2750            | Tissue             | Rio Termes-As Neves                  | Miño              | 42.1            | -8.4             |
| IBE-C2751            | Tissue             | Rio Ribeira Pequena-Laza             | Miño              | 42.1            | -7.4             |
| IBE-C2752            | Tissue             | Rio Ribeira Pequena-Laza             | Miño              | 42.1            | -7.4             |
| IBE-C2753            | Tissue             | Rio Bullan-Navia de Suarna           | Cantabrian Basins | 42.9            | -7.1             |
| IBE-C2754            | Tissue             | Rio Marinan-Obarco                   | Miño              | 42.4            | -7.0             |
| IBE-C2755            | Tissue             | Rio Leizaran-Berastegi               | Cantabrian Basins | 43.2            | -2.0             |
| IBE-C2756            | Tissue             | Rio Aiaturrieta-Ataun                | Cantabrian Basins | 43.0            | -2.1             |
| IBE-C2757            | Tissue             | Rio Amundarain-Zaldibia              | Cantabrian Basins | 43.1            | -2.0             |
| IBE-C2760            | Tissue             | Rio Erasote-Leitza                   | Cantabrian Basins | 43.1            | -1.9             |
| IBE-C2763            | Tissue             | Rio Olazar-Eugi                      | Ebro              | 43.0            | -1.5             |
| IBE-C2765            | Tissue             | Rio Ezpelura-Urrotz                  | Cantabrian Basins | 43.1            | -1.7             |
| IBE-C2781            | Tissue             | Rio Ameztia-Labaien                  | Cantabrian Basins | 43.1            | -1.7             |

|           |                            |                                  |                   |      |      |
|-----------|----------------------------|----------------------------------|-------------------|------|------|
| IBE-C2791 | Tissue                     | Rio Urrobi-Auritz                | Ebro              | 43.0 | -1.3 |
| IBE-C2795 | Tissue                     | Rio Irati-Artozki                | Ebro              | 42.9 | -1.3 |
| IBE-C2796 | Tissue                     | Rio Sasoaran-Eugi                | Ebro              | 43.0 | -1.6 |
| IBE-C2798 | Tissue                     | Rio Arrazola-Orbaitzeta          | Ebro              | 43.0 | -1.2 |
| IBE-C2799 | Tissue                     | Rio Elama-Artikutza              | Cantabrian Basins | 43.2 | -1.8 |
| IBE-C2856 | Tissue                     | Rio Lamedo                       | Cantabrian Basins | 43.1 | -4.6 |
| IBE-C2892 | Tissue                     | Rio Cares-Cain                   | Cantabrian Basins | 43.2 | -4.9 |
| IBE-C2893 | Tissue                     | Rio Cares-Corona                 | Cantabrian Basins | 43.2 | -4.9 |
| IBE-C2894 | Tissue                     | Rio Cares-Casiellos              | Cantabrian Basins | 43.2 | -4.9 |
| IBE-C2950 | Faeces                     | Redes-Caleao                     | Cantabrian Basins | 43.2 | -5.4 |
| IBE-C2975 | Faeces                     | Ribeira do Castelo               | Duero             | 41.6 | -7.7 |
| IBE-C2990 | Faeces                     | Lousas-Cabecera Beca-Tamega      | Duero             | 41.6 | -7.8 |
| IBE-C3159 | Claw (EBD ADN1254)         | Rio Lillas-Cantalojas            | Tajo              | 41.2 | -3.2 |
| IBE-C3161 | Rib fragment (EBD ADN1256) | Navacepeda de Tormes             | Duero             | 40.4 | -5.2 |
| IBE-C3301 | Tissue                     | Paiva-Fraguas                    | Duero             | 40.8 | -7.8 |
| IBE-C3303 | Tissue                     | Sabor-Macas-Quintanilla          | Duero             | 41.8 | -6.6 |
| IBE-C3305 | Tissue                     | Paiva-Fraguas                    | Duero             | 40.8 | -7.8 |
| IBE-C3338 | Faeces                     | Rio Bullon                       | Cantabrian Basins | 43.1 | -4.5 |
| IBE-C3342 | Faeces                     | Rio Bullon-Valdeprado            | Cantabrian Basins | 43.1 | -4.5 |
| IBE-C3455 | Faeces                     | Pedroso-Najerilla-Pedroso        | Ebro              | 42.3 | -2.7 |
| IBE-C3473 | Faeces                     | Arroyo de Puente la Ra-Iregua    | Ebro              | 42.1 | -2.7 |
| IBE-C3474 | Faeces                     | Tobia-Najerilla                  | Ebro              | 42.2 | -2.9 |
| IBE-C3475 | Faeces                     | Tobia-Najerilla                  | Ebro              | 42.3 | -2.9 |
| IBE-C3481 | Faeces                     | Tobia-Najerilla                  | Ebro              | 42.3 | -2.9 |
| IBE-C3482 | Faeces                     | Lumbreras-Iregua-Lumbreras       | Ebro              | 42.1 | -2.6 |
| IBE-C3486 | Faeces                     | Arroyo la Vieja-Iregua-Lumbreras | Ebro              | 42.0 | -2.6 |
| IBE-C3489 | Faeces                     | Arroyo la Vieja-Iregua-Lumbreras | Ebro              | 42.0 | -2.6 |
| IBE-C3522 | Tissue                     | Sabor-Franca-Soutelo             | Duero             | 41.9 | -6.8 |
| IBE-C3541 | Tissue                     | Sabor-Abaixo de Gimonde          | Duero             | 41.8 | -6.7 |
| IBE-C3545 | Tissue                     | Sabor-Franca-Soutelo             | Duero             | 41.9 | -6.8 |
| IBE-C3602 | Tissue                     | Corgo-Cabril-Arnal               | Duero             | 41.3 | -7.8 |
| IBE-C3620 | Faeces                     | Curueno                          | Duero             | 42.9 | -5.4 |
| IBE-C3623 | Faeces                     | Redes-Caleao                     | Cantabrian Basins | 43.2 | -5.4 |
| IBE-C3637 | Tissue                     | Sabor-Franca-Soutelo             | Duero             | 41.9 | -6.8 |
| IBE-C3638 | Tissue                     | Sabor-Franca-Soutelo             | Duero             | 41.9 | -6.8 |
| IBE-C3641 | Faeces                     | Redes-Monasterio                 | Cantabrian Basins | 43.2 | -5.3 |
| IBE-C3647 | Tissue                     | Sabor-Franca-Soutelo             | Duero             | 41.9 | -6.8 |
| IBE-C3756 | Tissue                     | La Soledad                       | Duero             | 42.2 | -3.1 |
| IBE-C3759 | Tissue                     | Urumea                           | Cantabrian Basins | 43.1 | -1.8 |
| IBE-C3762 | Tissue                     | Luzaide                          | Adour             | 43.0 | -1.3 |
| IBE-C3763 | Tissue                     | Aritzakun                        | Adour             | 43.3 | -1.4 |
| IBE-S1925 | Tissue                     | Riu Ritort-Camprodon             | Catalan Basins    | 42.3 | 2.4  |
| IBE-S2012 | Faeces                     | Riu del Canto-Soriguera          | Ebro              | 42.4 | 1.2  |
| IBE-S2026 | Faeces                     | Riu del Canto-Soriguera          | Ebro              | 42.4 | 1.2  |
| IBE-S2762 | Faeces                     | Hecho-Aragon-Subordan            | Ebro              | 42.8 | -0.6 |
| IBE-S2764 | Faeces                     | Hecho-Aragon-Subordan            | Ebro              | 42.9 | -0.7 |
| IBE-S2768 | Faeces                     | Hecho-Aragon-Subordan            | Ebro              | 42.9 | -0.7 |
| IBE-S2773 | Faeces                     | Hecho-Aragon-Subordan            | Ebro              | 42.8 | -0.7 |

**Table S2.** Primers used for the amplification of three overlapping fragments of the mitochondrial cytochrome *b* gene and a D-loop fragment.

| <b>Marker</b>       | <b>Primer sequences</b>                                | <b>Length</b> |
|---------------------|--------------------------------------------------------|---------------|
| cytochrome <i>b</i> | ACTAATGACATGAAAAATCATCGTT /<br>TACAAGATCAGTTCCGATGTAAG | 483           |
| cytochrome <i>b</i> | TCTTACCATGGGGTCAAATATC /<br>AGATAATTAGAATGAGGATTAGTG   | 278           |
| cytochrome <i>b</i> | GGATTATCATCCGACACTGATAA /<br>TTTTTCGTTTTTTGGTTTACAAGAC | 516           |
| D-loop              | CCGCCACCAACACCCAAAGCTG /<br>GATGGTAGTCGAGAGATAACCT     | 367           |

**Table S3.** Nuclear intron markers and primers used in this study.

| Marker          | Primer sequences                                      | T (°C) | Length | Differences<br><i>Galemys</i> -<br><i>Desmana</i> |
|-----------------|-------------------------------------------------------|--------|--------|---------------------------------------------------|
| <i>ACOX2-3</i>  | CCTSGGCTCDGAGGAGCAGAT /<br>GGGCTGTGHAYCACAAACTCCT     | 60     | 381    | 15                                                |
| <i>ACPT-4</i>   | GAYTTTGACCGSACVCTGGAGAG /<br>AGYAGYTCVYGGTATCGRGGACA  | 60     | 279    | 28                                                |
| <i>COPS7A-4</i> | TACAGCATYGGRCGRGACATCCA /<br>TCACYTGCTCCTCRATGCCKGACA | 62     | 634    | 23                                                |
| <i>DHRS3-3</i>  | GACATCACCATCCTGGTGAACAA /<br>AGGGTCAGGCTCTCCATGAAG    | TD     | 259    | 27                                                |
| <i>LANCL1-4</i> | TTTGGARWRGARAARATTCCTCA /<br>GRTACCAAYTCRTACAWCAGTGG  | TD     | 523    | 25                                                |
| <i>PRPF31-3</i> | GTCATYGTRGAYGCYAACAAC /<br>BTTSACNGTGCGGATGTAATC      | 61     | 487    | 28                                                |
| <i>ROGDI-7</i>  | CTGATGGAYGCYGTGATGCTGCA /<br>CACGGTGAGGCASAGCTTGTTGA  | 60     | 291    | 20                                                |
| <i>SMYD4-5</i>  | CAGCCTYCTGAAYCAYTCCTG /<br>CAGBNRCAGTCAAAGAARTACTG    | TD     | 402    | 15                                                |

TD: touchdown PCR in which the annealing temperature was lowered from 65 °C to 50 °C at 1 °C decrease per cycle.

**Table S4. GenBank accession numbers**

| <b>Specimen Code</b> | <b>Species</b>            | <b>cytochrome b</b> | <b>D-loop (1-342)</b> | <b>ACOX2-3</b> | <b>ACPT-4</b> | <b>COPS7A-4</b> | <b>DHRS3-3</b> | <b>LANCL1-4</b> | <b>PRPF31-3</b> | <b>ROGDI-7</b> | <b>SMYD4-5</b> |
|----------------------|---------------------------|---------------------|-----------------------|----------------|---------------|-----------------|----------------|-----------------|-----------------|----------------|----------------|
| IBE-C216             | <i>Galemys pyrenaicus</i> | JX290604            | JX290738              |                |               |                 |                |                 |                 |                |                |
| IBE-C224             | <i>Galemys pyrenaicus</i> | JX290605            | JX290739              |                |               |                 |                |                 |                 |                |                |
| IBE-C320             | <i>Galemys pyrenaicus</i> | JX290649            | JX290783              |                |               |                 |                |                 |                 |                |                |
| IBE-C321             | <i>Galemys pyrenaicus</i> | JX290650            | JX290784              |                |               |                 |                |                 |                 |                |                |
| IBE-C421             | <i>Galemys pyrenaicus</i> | JX290678            | JX290812              | JX290963       | JX291006      | JX291056        | JX290933       | JX290870        | JX291086        | JX290903       | JX290994       |
| IBE-C422             | <i>Galemys pyrenaicus</i> | JX290679            | JX290813              |                |               |                 |                |                 |                 |                |                |
| IBE-C428             | <i>Galemys pyrenaicus</i> | JX290680            | JX290814              | JX290964       | JX291007      | JX291057        | JX290934       | JX290871        | JX291087        | JX290904       | JX290995       |
| IBE-C437             | <i>Galemys pyrenaicus</i> | JX290681            | JX290815              |                |               |                 |                |                 |                 |                |                |
| IBE-C438             | <i>Galemys pyrenaicus</i> | JX290682            | JX290816              |                |               |                 |                |                 |                 |                |                |
| IBE-C448             | <i>Galemys pyrenaicus</i> | JX290683            | JX290817              | JX290965       | JX291008      | JX291058        | JX290935       | JX290872        | JX291088        | JX290905       | JX290996       |
| IBE-C449             | <i>Galemys pyrenaicus</i> | JX290684            | JX290818              | JX290966       | JX291009      | JX291059        | JX290936       | JX290873        | JX291089        | JX290906       | JX290997       |
| IBE-C452             | <i>Galemys pyrenaicus</i> | JX290685            | JX290819              | JX290967       | JX291010      | JX291060        | JX290937       | JX290874        | JX291090        | JX290907       | JX290998       |
| IBE-C485             | <i>Galemys pyrenaicus</i> | JX290686            | JX290820              | JX290968       | JX291034      | JX291061        | JX290938       | JX290875        | JX291091        | JX290908       | JX290999       |
| IBE-C539             | <i>Galemys pyrenaicus</i> | JX290687            | JX290821              |                |               |                 |                |                 |                 |                |                |
| IBE-C600             | <i>Galemys pyrenaicus</i> | JX290688            | JX290822              |                |               |                 |                |                 |                 |                |                |
| IBE-C618             | <i>Galemys pyrenaicus</i> | JX290689            | JX290823              |                |               |                 |                |                 |                 |                |                |
| IBE-C660             | <i>Galemys pyrenaicus</i> | JX290690            | JX290824              | JX290969       | JX291029      | JX291062        | JX290939       | JX290876        | JX291092        | JX290909       | JX291000       |
| IBE-C683             | <i>Galemys pyrenaicus</i> | JX290691            | JX290825              |                |               |                 |                |                 |                 |                |                |
| IBE-C720             | <i>Galemys pyrenaicus</i> | JX290692            | JX290826              |                |               |                 |                |                 |                 |                |                |
| IBE-C723             | <i>Galemys pyrenaicus</i> | JX290693            | JX290827              |                |               |                 |                |                 |                 |                |                |
| IBE-C737             | <i>Galemys pyrenaicus</i> | JX290694            | JX290828              |                |               |                 |                |                 |                 |                |                |
| IBE-C779             | <i>Galemys pyrenaicus</i> | JX290695            | JX290829              |                |               |                 |                |                 |                 |                |                |
| IBE-C802             | <i>Galemys pyrenaicus</i> | JX290696            | JX290830              |                |               |                 |                |                 |                 |                |                |
| IBE-C831             | <i>Galemys pyrenaicus</i> | JX290697            | JX290831              |                |               |                 |                |                 |                 |                |                |
| IBE-C844             | <i>Galemys pyrenaicus</i> | JX290698            | JX290832              |                |               |                 |                |                 |                 |                |                |
| IBE-C861             | <i>Galemys pyrenaicus</i> | JX290699            | JX290833              |                |               |                 |                |                 |                 |                |                |
| IBE-C894             | <i>Galemys pyrenaicus</i> | JX290700            | JX290834              |                |               |                 |                |                 |                 |                |                |
| IBE-C895             | <i>Galemys pyrenaicus</i> | JX290701            | JX290835              |                |               |                 |                |                 |                 |                |                |
| IBE-C919             | <i>Galemys pyrenaicus</i> | JX290702            | JX290836              | JX290970       | JX291030      | JX291063        | JX290940       | JX290877        | JX291093        | JX290910       | JX291001       |
| IBE-C922             | <i>Galemys pyrenaicus</i> | JX290703            | JX290837              |                |               |                 |                |                 |                 |                |                |
| IBE-C964             | <i>Galemys pyrenaicus</i> | JX290704            | JX290838              |                |               |                 |                |                 |                 |                |                |
| IBE-C975             | <i>Galemys pyrenaicus</i> | JX290705            | JX290839              |                |               |                 |                |                 |                 |                |                |
| IBE-C979             | <i>Galemys pyrenaicus</i> | JX290706            | JX290840              |                |               |                 |                |                 |                 |                |                |
| IBE-C982             | <i>Galemys pyrenaicus</i> | JX290707            | JX290841              |                |               |                 |                |                 |                 |                |                |
| IBE-C990             | <i>Galemys pyrenaicus</i> | JX290708            | JX290842              |                |               |                 |                |                 |                 |                |                |
| IBE-C1002            | <i>Galemys pyrenaicus</i> | JX290582            | JX290716              |                |               |                 |                |                 |                 |                |                |
| IBE-C1053            | <i>Galemys pyrenaicus</i> | JX290583            | JX290717              |                |               |                 |                |                 |                 |                |                |
| IBE-C1068            | <i>Galemys pyrenaicus</i> | JX290584            | JX290718              |                |               |                 |                |                 |                 |                |                |
| IBE-C1069            | <i>Galemys pyrenaicus</i> | JX290585            | JX290719              | JX290943       | JX291027      | JX291036        | JX290913       | JX290850        | JX291066        | JX290883       | JX290974       |

|           |                           |          |          |          |          |          |          |          |          |          |          |  |
|-----------|---------------------------|----------|----------|----------|----------|----------|----------|----------|----------|----------|----------|--|
| IBE-C1070 | <i>Galemys pyrenaicus</i> | JX290586 | JX290720 |          |          |          |          |          |          |          |          |  |
| IBE-C1072 | <i>Galemys pyrenaicus</i> | JX290587 | JX290721 |          |          |          |          |          |          |          |          |  |
| IBE-C1075 | <i>Galemys pyrenaicus</i> | JX290588 | JX290722 |          |          |          |          |          |          |          |          |  |
| IBE-C1077 | <i>Galemys pyrenaicus</i> | JX290589 | JX290723 |          |          |          |          |          |          |          |          |  |
| IBE-C1132 | <i>Galemys pyrenaicus</i> | JX290590 | JX290724 |          |          |          |          |          |          |          |          |  |
| IBE-C1154 | <i>Galemys pyrenaicus</i> | JX290591 | JX290725 |          |          |          |          |          |          |          |          |  |
| IBE-C1174 | <i>Galemys pyrenaicus</i> | JX290592 | JX290726 |          |          |          |          |          |          |          |          |  |
| IBE-C1177 | <i>Galemys pyrenaicus</i> | JX290593 | JX290727 |          |          |          |          |          |          |          |          |  |
| IBE-C1611 | <i>Galemys pyrenaicus</i> | JX290594 | JX290728 |          |          |          |          |          |          |          |          |  |
| IBE-C1612 | <i>Galemys pyrenaicus</i> | JX290595 | JX290729 |          |          |          |          |          |          |          |          |  |
| IBE-C1661 | <i>Galemys pyrenaicus</i> | JX290596 | JX290730 |          |          |          |          |          |          |          |          |  |
| IBE-C1671 | <i>Galemys pyrenaicus</i> | JX290597 | JX290731 |          |          |          |          |          |          |          |          |  |
| IBE-C1687 | <i>Galemys pyrenaicus</i> | JX290598 | JX290732 |          |          |          |          |          |          |          |          |  |
| IBE-C1729 | <i>Galemys pyrenaicus</i> | JX290599 | JX290733 |          |          |          |          |          |          |          |          |  |
| IBE-C1843 | <i>Galemys pyrenaicus</i> | JX290600 | JX290734 |          |          |          |          |          |          |          |          |  |
| IBE-C1851 | <i>Galemys pyrenaicus</i> | JX290601 | JX290735 |          |          |          |          |          |          |          |          |  |
| IBE-C1869 | <i>Galemys pyrenaicus</i> | JX290602 | JX290736 |          |          |          |          |          |          |          |          |  |
| IBE-C1880 | <i>Galemys pyrenaicus</i> | JX290603 | JX290737 |          |          |          |          |          |          |          |          |  |
| IBE-C2517 | <i>Galemys pyrenaicus</i> | JX290606 | JX290740 |          |          |          |          |          |          |          |          |  |
| IBE-C2596 | <i>Galemys pyrenaicus</i> | JX290607 | JX290741 |          |          |          |          |          |          |          |          |  |
| IBE-C2597 | <i>Galemys pyrenaicus</i> | JX290608 | JX290742 |          |          |          |          |          |          |          |          |  |
| IBE-C2607 | <i>Galemys pyrenaicus</i> | JX290609 | JX290743 |          |          |          |          |          |          |          |          |  |
| IBE-C2736 | <i>Galemys pyrenaicus</i> | JX290610 | JX290744 |          |          |          |          |          |          |          |          |  |
| IBE-C2737 | <i>Galemys pyrenaicus</i> | JX290611 | JX290745 | JX290944 | JX291012 | JX291037 | JX290914 | JX290851 | JX291067 | JX290884 | JX290975 |  |
| IBE-C2738 | <i>Galemys pyrenaicus</i> | JX290612 | JX290746 |          |          |          |          |          |          |          |          |  |
| IBE-C2739 | <i>Galemys pyrenaicus</i> | JX290613 | JX290747 | JX290945 | JX291019 | JX291038 | JX290915 | JX290852 | JX291068 | JX290885 | JX290976 |  |
| IBE-C2740 | <i>Galemys pyrenaicus</i> | JX290614 | JX290748 | JX290946 | JX291013 | JX291039 | JX290916 | JX290853 | JX291069 | JX290886 | JX290977 |  |
| IBE-C2741 | <i>Galemys pyrenaicus</i> | JX290615 | JX290749 |          |          |          |          |          |          |          |          |  |
| IBE-C2742 | <i>Galemys pyrenaicus</i> | JX290616 | JX290750 |          |          |          |          |          |          |          |          |  |
| IBE-C2743 | <i>Galemys pyrenaicus</i> | JX290617 | JX290751 | JX290947 | JX291025 | JX291040 | JX290917 | JX290854 | JX291070 | JX290887 | JX290978 |  |
| IBE-C2744 | <i>Galemys pyrenaicus</i> | JX290618 | JX290752 |          |          |          |          |          |          |          |          |  |
| IBE-C2745 | <i>Galemys pyrenaicus</i> | JX290619 | JX290753 |          |          |          |          |          |          |          |          |  |
| IBE-C2746 | <i>Galemys pyrenaicus</i> | JX290620 | JX290754 |          |          |          |          |          |          |          |          |  |
| IBE-C2747 | <i>Galemys pyrenaicus</i> | JX290621 | JX290755 |          |          |          |          |          |          |          |          |  |
| IBE-C2749 | <i>Galemys pyrenaicus</i> | JX290622 | JX290756 | JX290948 | JX291014 | JX291041 | JX290918 | JX290855 | JX291071 | JX290888 | JX290979 |  |
| IBE-C2750 | <i>Galemys pyrenaicus</i> | JX290623 | JX290757 |          |          |          |          |          |          |          |          |  |
| IBE-C2751 | <i>Galemys pyrenaicus</i> | JX290624 | JX290758 | JX290949 | JX291015 | JX291042 | JX290919 | JX290856 | JX291072 | JX290889 | JX290980 |  |
| IBE-C2752 | <i>Galemys pyrenaicus</i> | JX290625 | JX290759 |          |          |          |          |          |          |          |          |  |
| IBE-C2753 | <i>Galemys pyrenaicus</i> | JX290626 | JX290760 | JX290950 | JX291020 | JX291043 | JX290920 | JX290857 | JX291073 | JX290890 | JX290981 |  |
| IBE-C2754 | <i>Galemys pyrenaicus</i> | JX290627 | JX290761 | JX290951 | JX291026 | JX291044 | JX290921 | JX290858 | JX291074 | JX290891 | JX290982 |  |
| IBE-C2755 | <i>Galemys pyrenaicus</i> | JX290628 | JX290762 | JX290952 | JX291021 | JX291045 | JX290922 | JX290859 | JX291075 | JX290892 | JX290983 |  |
| IBE-C2756 | <i>Galemys pyrenaicus</i> | JX290629 | JX290763 | JX290953 | JX291022 | JX291046 | JX290923 | JX290860 | JX291076 | JX290893 | JX290984 |  |

|           |                           |          |          |          |          |          |          |          |          |          |          |
|-----------|---------------------------|----------|----------|----------|----------|----------|----------|----------|----------|----------|----------|
| IBE-C2757 | <i>Galemys pyrenaicus</i> | JX290630 | JX290764 | JX290954 | JX291023 | JX291047 | JX290924 | JX290861 | JX291077 | JX290894 | JX290985 |
| IBE-C2760 | <i>Galemys pyrenaicus</i> | JX290631 | JX290765 |          |          |          |          |          |          |          |          |
| IBE-C2763 | <i>Galemys pyrenaicus</i> | JX290632 | JX290766 | JX290955 | JX291016 | JX291048 | JX290925 | JX290862 | JX291078 | JX290895 | JX290986 |
| IBE-C2765 | <i>Galemys pyrenaicus</i> | JX290633 | JX290767 | JX290956 | JX291017 | JX291049 | JX290926 | JX290863 | JX291079 | JX290896 | JX290987 |
| IBE-C2781 | <i>Galemys pyrenaicus</i> | JX290634 | JX290768 |          |          |          |          |          |          |          |          |
| IBE-C2791 | <i>Galemys pyrenaicus</i> | JX290635 | JX290769 |          |          |          |          |          |          |          |          |
| IBE-C2795 | <i>Galemys pyrenaicus</i> | JX290636 | JX290770 | JX290957 | JX291018 | JX291050 | JX290927 | JX290864 | JX291080 | JX290897 | JX290988 |
| IBE-C2796 | <i>Galemys pyrenaicus</i> | JX290637 | JX290771 |          |          |          |          |          |          |          |          |
| IBE-C2798 | <i>Galemys pyrenaicus</i> | JX290638 | JX290772 |          |          |          |          |          |          |          |          |
| IBE-C2799 | <i>Galemys pyrenaicus</i> | JX290639 | JX290773 | JX290958 | JX291024 | JX291051 | JX290928 | JX290865 | JX291081 | JX290898 | JX290989 |
| IBE-C2856 | <i>Galemys pyrenaicus</i> | JX290640 | JX290774 | JX290959 | JX291028 | JX291052 | JX290929 | JX290866 | JX291082 | JX290899 | JX290990 |
| IBE-C2892 | <i>Galemys pyrenaicus</i> | JX290641 | JX290775 | JX290960 | JX291033 | JX291053 | JX290930 | JX290867 | JX291083 | JX290900 | JX290991 |
| IBE-C2893 | <i>Galemys pyrenaicus</i> | JX290642 | JX290776 | JX290961 | JX291031 | JX291054 | JX290931 | JX290868 | JX291084 | JX290901 | JX290992 |
| IBE-C2894 | <i>Galemys pyrenaicus</i> | JX290643 | JX290777 | JX290962 | JX291032 | JX291055 | JX290932 | JX290869 | JX291085 | JX290902 | JX290993 |
| IBE-C2950 | <i>Galemys pyrenaicus</i> | JX290644 | JX290778 |          |          |          |          |          |          |          |          |
| IBE-C2975 | <i>Galemys pyrenaicus</i> | JX290645 | JX290779 |          |          |          |          |          |          |          |          |
| IBE-C2990 | <i>Galemys pyrenaicus</i> | JX290646 | JX290780 |          |          |          |          |          |          |          |          |
| IBE-C3159 | <i>Galemys pyrenaicus</i> | JX290647 | JX290781 |          |          |          |          |          |          |          |          |
| IBE-C3161 | <i>Galemys pyrenaicus</i> | JX290648 | JX290782 |          |          |          |          |          |          |          |          |
| IBE-C3301 | <i>Galemys pyrenaicus</i> | JX290651 | JX290785 |          |          |          |          |          |          |          |          |
| IBE-C3303 | <i>Galemys pyrenaicus</i> | JX290652 | JX290786 |          |          |          |          |          |          |          |          |
| IBE-C3305 | <i>Galemys pyrenaicus</i> | JX290653 | JX290787 |          |          |          |          |          |          |          |          |
| IBE-C3338 | <i>Galemys pyrenaicus</i> | JX290654 | JX290788 |          |          |          |          |          |          |          |          |
| IBE-C3342 | <i>Galemys pyrenaicus</i> | JX290655 | JX290789 |          |          |          |          |          |          |          |          |
| IBE-C3455 | <i>Galemys pyrenaicus</i> | JX290656 | JX290790 |          |          |          |          |          |          |          |          |
| IBE-C3473 | <i>Galemys pyrenaicus</i> | JX290657 | JX290791 |          |          |          |          |          |          |          |          |
| IBE-C3474 | <i>Galemys pyrenaicus</i> | JX290658 | JX290792 |          |          |          |          |          |          |          |          |
| IBE-C3475 | <i>Galemys pyrenaicus</i> | JX290659 | JX290793 |          |          |          |          |          |          |          |          |
| IBE-C3481 | <i>Galemys pyrenaicus</i> | JX290660 | JX290794 |          |          |          |          |          |          |          |          |
| IBE-C3482 | <i>Galemys pyrenaicus</i> | JX290661 | JX290795 |          |          |          |          |          |          |          |          |
| IBE-C3486 | <i>Galemys pyrenaicus</i> | JX290662 | JX290796 |          |          |          |          |          |          |          |          |
| IBE-C3489 | <i>Galemys pyrenaicus</i> | JX290663 | JX290797 |          |          |          |          |          |          |          |          |
| IBE-C3522 | <i>Galemys pyrenaicus</i> | JX290664 | JX290798 |          |          |          |          |          |          |          |          |
| IBE-C3541 | <i>Galemys pyrenaicus</i> | JX290665 | JX290799 |          |          |          |          |          |          |          |          |
| IBE-C3545 | <i>Galemys pyrenaicus</i> | JX290666 | JX290800 |          |          |          |          |          |          |          |          |
| IBE-C3602 | <i>Galemys pyrenaicus</i> | JX290667 | JX290801 |          |          |          |          |          |          |          |          |
| IBE-C3620 | <i>Galemys pyrenaicus</i> | JX290668 | JX290802 |          |          |          |          |          |          |          |          |
| IBE-C3623 | <i>Galemys pyrenaicus</i> | JX290669 | JX290803 |          |          |          |          |          |          |          |          |
| IBE-C3637 | <i>Galemys pyrenaicus</i> | JX290670 | JX290804 |          |          |          |          |          |          |          |          |
| IBE-C3638 | <i>Galemys pyrenaicus</i> | JX290671 | JX290805 |          |          |          |          |          |          |          |          |
| IBE-C3641 | <i>Galemys pyrenaicus</i> | JX290672 | JX290806 |          |          |          |          |          |          |          |          |
| IBE-C3647 | <i>Galemys pyrenaicus</i> | JX290673 | JX290807 |          |          |          |          |          |          |          |          |

|           |                           |          |          |          |          |          |          |          |          |          |          |
|-----------|---------------------------|----------|----------|----------|----------|----------|----------|----------|----------|----------|----------|
| IBE-C3756 | <i>Galemys pyrenaicus</i> | JX290674 | JX290808 |          |          |          |          |          |          |          |          |
| IBE-C3759 | <i>Galemys pyrenaicus</i> | JX290675 | JX290809 |          |          |          |          |          |          |          |          |
| IBE-C3762 | <i>Galemys pyrenaicus</i> | JX290676 | JX290810 |          |          |          |          |          |          |          |          |
| IBE-C3763 | <i>Galemys pyrenaicus</i> | JX290677 | JX290811 |          |          |          |          |          |          |          |          |
| IBE-S1925 | <i>Galemys pyrenaicus</i> | JX290709 | JX290843 | JX290971 | JX291011 | JX291064 | JX290941 | JX290878 | JX291094 | JX290911 | JX291002 |
| IBE-S2012 | <i>Galemys pyrenaicus</i> | JX290710 | JX290844 |          |          |          |          |          |          |          |          |
| IBE-S2026 | <i>Galemys pyrenaicus</i> | JX290711 | JX290845 |          |          |          |          |          |          |          |          |
| IBE-S2762 | <i>Galemys pyrenaicus</i> | JX290712 | JX290846 |          |          |          |          |          |          |          |          |
| IBE-S2764 | <i>Galemys pyrenaicus</i> | JX290713 | JX290847 |          |          |          |          |          |          |          |          |
| IBE-S2768 | <i>Galemys pyrenaicus</i> | JX290714 | JX290848 |          |          |          |          |          |          |          |          |
| IBE-S2773 | <i>Galemys pyrenaicus</i> | JX290715 | JX290849 |          |          |          |          |          |          |          |          |
| IBE-C3164 | <i>Desmana moschata</i>   | JX290581 |          | JX290972 | JX291004 | JX291065 | JX290912 | JX290879 | JX291095 | JX290882 | JX291003 |
| IBE-C686  | <i>Talpa occidentalis</i> |          |          | JX290973 | JX291005 | JX291035 | JX290942 | JX290880 | JX291096 | JX290881 |          |



**Table S5.** Calibration constraints (in Myr) used as priors in the BEAST analysis of Laurasiatherian mammals.

| <b>Clade (Node number)</b> | <b>Minimum hard bound</b> | <b>Maximum soft bound</b> | <b>Lognormal parameters</b> |               |
|----------------------------|---------------------------|---------------------------|-----------------------------|---------------|
|                            |                           |                           | <b>Mean</b>                 | <b>Offset</b> |
| Laurasiatheria (1)         | 62.50                     | 131.50                    | 21.95                       | 62.50         |
| Ferungulata (2)            | 62.50                     | 131.50                    | 21.95                       | 62.50         |
| Cetartiodactyla (3)        | 52.40                     | 65.80                     | 4.27                        | 52.40         |
| Cetruminantia (4)          | 52.40                     | 65.80                     | 4.27                        | 52.40         |
| Zooamata (5)               | 62.50                     | 131.50                    | 21.95                       | 62.50         |
| Carnivora (6)              | 39.68                     | 65.80                     | 8.28                        | 39.68         |

Figure S1

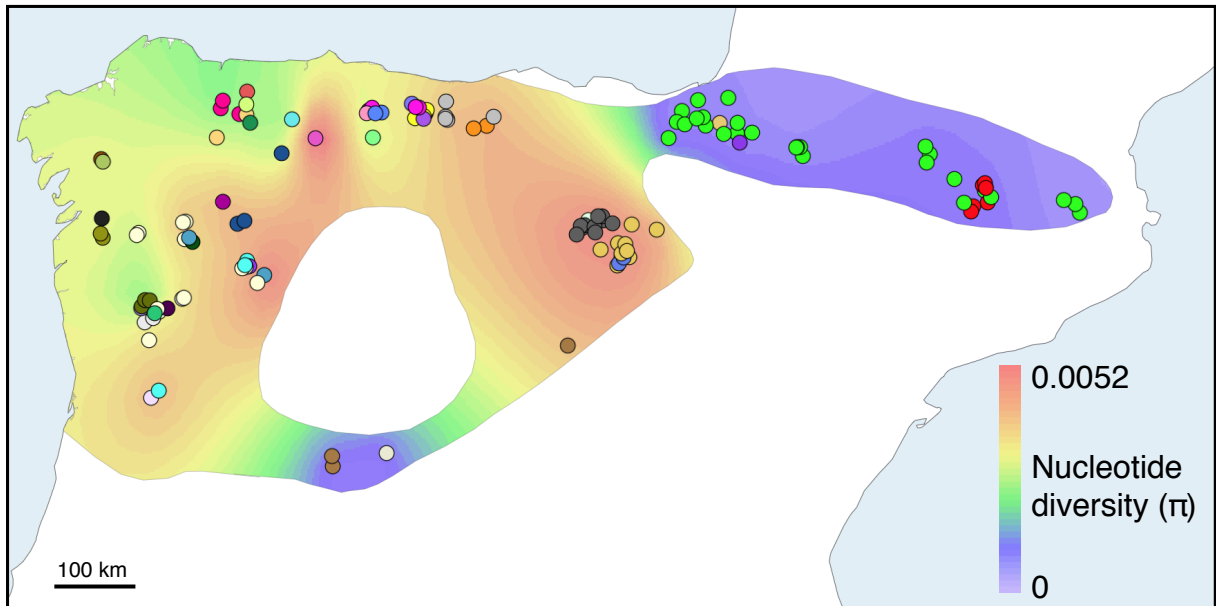

**Figure S1 - Contour plot of genetic diversity ( $\pi$ ) of *Galemys pyrenaicus* in which samples of populations in secondary contact were mixed in the calculations.** Colors of the contour plot indicate interpolated genetic diversity. The contour plot is only drawn for the species distribution area. Sample points have been randomly repositioned within a circle of 5 km radius to reveal samples of the same location. A different color is used for each haplotype and therefore a greater variety of colors in an area also indicates higher genetic diversity.
